# Supplementary material
Source: MDPI journal article supplement (https://www.mdpi.com/2073-4441/14/14/2246)
Supplement: s1 [file s1]

# Supplementary Materials

## Nitrogen Removal from the Simulated Wastewater of Ionic Rare Earth Mining Using a Biological Aerated Filter: Influence of Medium and Carbon Source

Silin Chen <sup>1,2</sup>, Chengxiu Wu <sup>1,2</sup>, Benru Song <sup>1,2</sup>, Philip Antwi <sup>1,2</sup>, Ming Chen <sup>1,2</sup> and Wuhui Luo <sup>1,2,3,\*</sup>

<sup>1</sup> Jiangxi Key Laboratory of Mining & Metallurgy Environmental Pollution Control, Jiangxi University of Science and Technology, Ganzhou 341000, PR China; csl1801@163.com (S.C.); 18470720837@163.com (C.W.); songbenru@163.com (B.S.); kobbyjean@yahoo.co.uk (P.A.); cm@jxust.edu.cn (M.C.)

<sup>2</sup> School of Resources and Environmental Engineering, Jiangxi University of Science and Technology, Ganzhou 341000, P.R. China

<sup>3</sup> Ganzhou Technology Innovation Center for Mine Ecology Remediation, Ganzhou 341000, PR China

\* Correspondence: luo070221@126.com

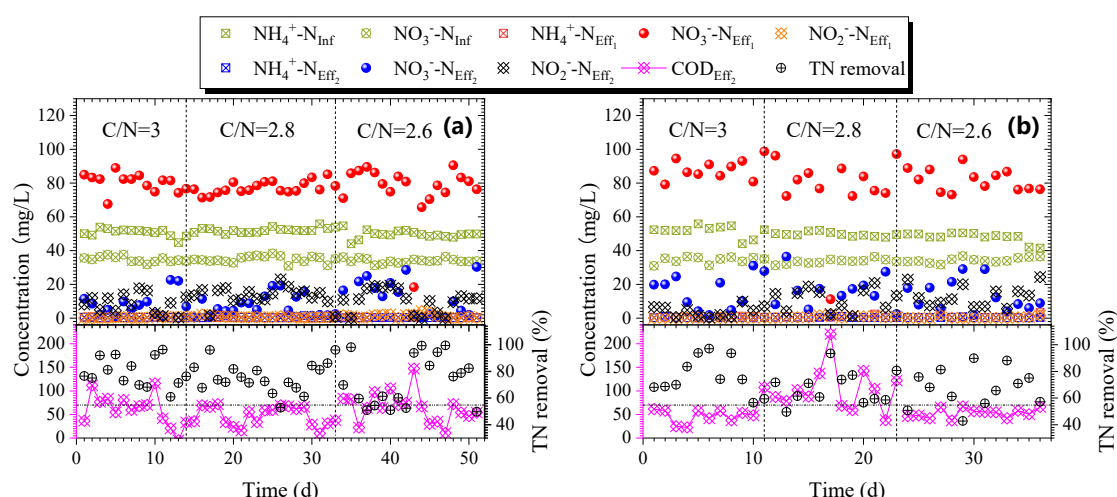

**Figure S1.** Operational performance of (a) quartz- and (b) ceramsite-packed BAF after adding rice husk.

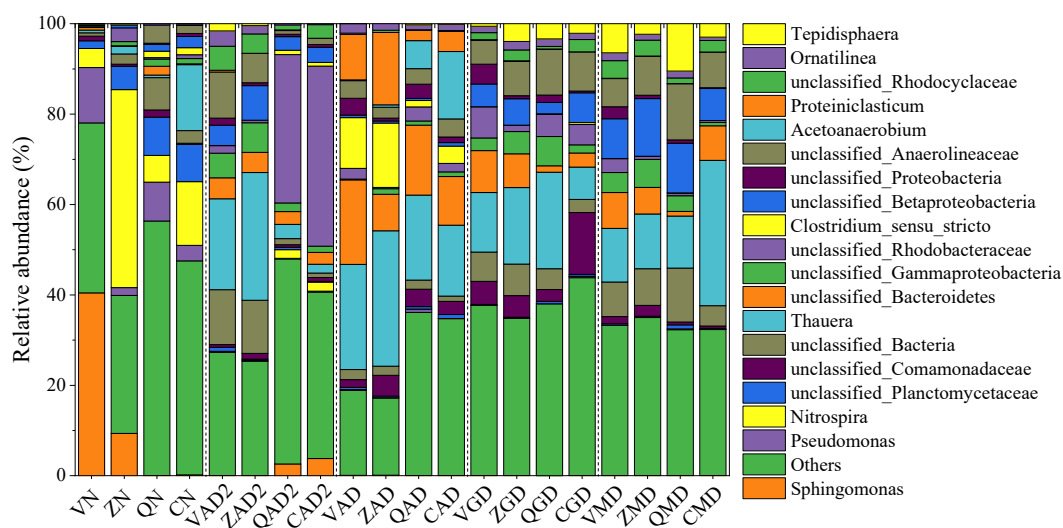

**Figure S2.** Relative abundance of microbial community at genus level.
